# Supplementary material
Source: publisher figshare collection journal article supplement (https://sage.figshare.com/articles/dataset/_/9831980)
Supplement: Supplementary file 1 [file 17636669]

**Simulation of Vacuum Ultraviolet Absorption  
Spectra: An Investigation of PIONA  
Hydrocarbon Class Compounds  
Supporting Information**

James X. Mao,<sup>†</sup> Phillip Walsh,<sup>‡</sup> Peter Kroll,<sup>†</sup> and Kevin A. Schug<sup>\*,†,¶</sup>

<sup>†</sup>*Department of Chemistry and Biochemistry, The University of Texas at Arlington,  
Arlington TX, USA*

<sup>‡</sup>*VUV Analytics, Inc., Cedar Park TX, USA*

<sup>¶</sup>*correspondence address: 700 Planetarium Pl., Box 19065, Arlington TX 76019-0065 USA*

E-mail: [kschug@uta.edu](mailto:kschug@uta.edu)

Phone: 817-272-3541. Fax: 817-272-3808

**Table S1: The optimized FWHMs, scaling factors, and corresponding SSRs for various paraffin compounds.**

| Paraffin    | Length Form Oscillator Strength |                |      | Velocity Form Oscillator Strength |                |      |
|-------------|---------------------------------|----------------|------|-----------------------------------|----------------|------|
|             | FWHM                            | Scaling Factor | SSR  | FWHM                              | Scaling Factor | SSR  |
| Methane     | 1.2                             | 0.98           | 1.7  | 1.2                               | 0.98           | 1.7  |
| Ethane      | 1.0                             | 0.98           | 3.8  | 1.0                               | 0.98           | 3.7  |
| Propane     | 1.1                             | 1.00           | 4.1  | 1.1                               | 1.00           | 4.1  |
| Butane      | 1.4                             | 1.02           | 5.4  | 1.4                               | 1.02           | 5.5  |
| Pentane     | 1.4                             | 1.02           | 9.9  | 1.3                               | 1.02           | 9.9  |
| Hexane      | 1.2                             | 1.02           | 8.3  | 1.2                               | 1.02           | 8.4  |
| Heptane     | 1.1                             | 1.02           | 9.4  | 1.2                               | 1.02           | 9.3  |
| Octane      | 1.1                             | 1.02           | 5.0  | 1.2                               | 1.02           | 5.1  |
| Nonane      | 1.2                             | 1.02           | 10.8 | 1.2                               | 1.02           | 10.7 |
| Decane      | 1.2                             | 1.02           | 10.8 | 1.1                               | 1.02           | 10.7 |
| Undecane    | 1.2                             | 1.02           | 11.5 | 1.2                               | 1.02           | 11.5 |
| Dodecane    | 1.2                             | 1.02           | 11.7 | 1.2                               | 1.02           | 11.7 |
| Tridecane   | 1.2                             | 1.02           | 13.0 | 1.2                               | 1.02           | 13.0 |
| Tetradecane | 1.2                             | 1.02           | 10.7 | 1.2                               | 1.02           | 10.8 |
| Pentadecane | 1.2                             | 1.02           | 12.8 | 1.2                               | 1.02           | 12.8 |
| Hexadecane  | 1.1                             | 1.02           | 19.0 | 1.2                               | 1.02           | 19.0 |
| Heptadecane | 1.2                             | 1.02           | 17.0 | 1.2                               | 1.02           | 17.0 |
| Octadecane  | 1.2                             | 1.02           | 19.0 | 1.2                               | 1.02           | 19.3 |
| Nonadecane  | 1.1                             | 1.02           | 22.8 | 1.1                               | 1.02           | 22.8 |
| Icosane     | 1.1                             | 1.02           | 32.5 | 1.1                               | 1.02           | 32.5 |
| Heneicosane | 1.1                             | 1.02           | 25.0 | 1.1                               | 1.02           | 25.0 |
| Docosane    | 1.1                             | 1.02           | 27.7 | 1.1                               | 1.02           | 27.7 |
| Tricosane   | 1.2                             | 1.02           | 25.0 | 1.1                               | 1.02           | 25.0 |
| Tetracosane | 1.1                             | 1.02           | 29.5 | 1.1                               | 1.02           | 29.5 |
| Pentacosane | 1.1                             | 1.02           | 30.5 | 1.1                               | 1.02           | 30.7 |

**Table S2: The optimized FWHMs, scaling factors, and corresponding SSRs for various isoparaffin compounds.**

| Isoparaffin             | Length Form Oscillator Strength |                |      | Velocity Form Oscillator Strength |                |      |
|-------------------------|---------------------------------|----------------|------|-----------------------------------|----------------|------|
|                         | FWHM                            | Scaling Factor | SSR  | FWHM                              | Scaling Factor | SSR  |
| 2,2-Dimethylbutane      | 1.9                             | 1.05           | 1.9  | 1.3                               | 1.02           | 2.5  |
| 2,3-Dimethylbutane      | 1.4                             | 1.02           | 2.5  | 1.4                               | 1.02           | 2.9  |
| 2,2-Dimethylhexane      | 1.1                             | 1.02           | 2.6  | 1.1                               | 1.02           | 2.7  |
| 2,3-Dimethylhexane      | 1.0                             | 1.02           | 1.2  | 1.0                               | 1.02           | 1.3  |
| 2,4-Dimethylhexane      | 1.2                             | 1.02           | 2.7  | 1.2                               | 1.02           | 2.8  |
| 2,5-Dimethylhexane      | 1.2                             | 1.02           | 1.1  | 1.2                               | 1.02           | 1.0  |
| 3,3-Dimethylhexane      | 1.1                             | 1.02           | 5.8  | 1.1                               | 1.02           | 6.0  |
| 2,2-Dimethylpentane     | 1.3                             | 1.02           | 3.7  | 1.2                               | 1.02           | 3.8  |
| 2,3-Dimethylpentane     | 1.0                             | 1.00           | 0.7  | 0.8                               | 0.99           | 0.7  |
| 2,4-Dimethylpentane     | 0.9                             | 1.02           | 10.8 | 0.9                               | 1.02           | 11.1 |
| 3,3-Dimethylpentane     | 1.5                             | 1.02           | 2.0  | 1.5                               | 1.02           | 1.9  |
| iso-pentane             | 1.1                             | 1.01           | 0.8  | 1.1                               | 1.01           | 0.9  |
| iso-butane              | 1.7                             | 1.01           | 3.9  | 1.6                               | 1.01           | 3.8  |
| iso-octane              | 1.4                             | 1.02           | 1.9  | 1.4                               | 1.02           | 1.9  |
| 2-Methylheptane         | 1.0                             | 1.02           | 0.4  | 1.0                               | 1.02           | 0.4  |
| 2-Methylhexane          | 1.0                             | 1.02           | 5.3  | 0.9                               | 1.02           | 5.4  |
| 2-Methylpentane         | 1.3                             | 1.02           | 5.7  | 1.3                               | 1.02           | 5.9  |
| 3-Methylheptane         | 1.4                             | 1.02           | 2.4  | 1.4                               | 1.02           | 2.4  |
| 3-Methylhexane          | 1.6                             | 1.02           | 2.5  | 1.6                               | 1.02           | 2.5  |
| 3-Methylpentane         | 1.5                             | 1.02           | 4.6  | 1.5                               | 1.02           | 4.7  |
| 4-Methylheptane         | 1.1                             | 1.02           | 1.3  | 1.1                               | 1.02           | 1.3  |
| 3-Ethylpentane          | 1.2                             | 1.02           | 5.5  | 1.2                               | 1.02           | 5.7  |
| 2-Methyl-3-ethylpentane | 1.0                             | 1.02           | 0.9  | 0.9                               | 1.02           | 1.0  |
| 3-Ethylhexane           | 0.8                             | 1.02           | 4.2  | 0.8                               | 1.02           | 4.2  |
| 2,2-Dimethylpropane     | 1.7                             | 1.02           | 4.9  | 1.7                               | 1.02           | 5.0  |
| 2,2,3-Trimethylbutane   | 1.5                             | 1.02           | 1.4  | 1.4                               | 1.02           | 1.3  |
| 2-Methylnonane          | 1.2                             | 1.02           | 11.4 | 1.2                               | 1.02           | 11.5 |
| 2-Methyloctane          | 1.1                             | 1.02           | 9.3  | 1.1                               | 1.02           | 10.5 |
| 3-Ethyloctane           | 1.0                             | 1.02           | 4.7  | 1.0                               | 1.02           | 4.8  |
| 3-Methylnonane          | 1.4                             | 1.02           | 10.8 | 1.3                               | 1.02           | 10.6 |
| 3-Methyloctane          | 1.2                             | 1.02           | 3.9  | 1.2                               | 1.02           | 4.0  |
| 5-Methylnonane          | 1.1                             | 1.02           | 17   | 1.2                               | 1.02           | 17.4 |
| 2,2-Dimethyloctane      | 1.3                             | 1.02           | 6.4  | 1.1                               | 1.02           | 6.6  |
| 2,3-Dimethyloctane      | 1.3                             | 1.02           | 1.8  | 1.3                               | 1.02           | 1.8  |
| 3,3-Dimethyloctane      | 1.3                             | 1.02           | 11.4 | 1.3                               | 1.02           | 11.6 |
| 3,3-Dimethylheptane     | 1.0                             | 1.02           | 1.9  | 1.0                               | 1.02           | 2.7  |
| 2,5-Dimethylheptane     | 1.0                             | 1.02           | 5.3  | 1.0                               | 1.02           | 5.9  |
| 2,3-Dimethylheptane     | 1.0                             | 1.02           | 7.0  | 1.0                               | 1.02           | 8.0  |
| 3,3-Dimethylpentane     | 1.4                             | 1.02           | 5.7  | 1.4                               | 1.02           | 6.6  |
| 3,4-Dimethylheptane (D) | 1.1                             | 1.02           | 4.4  | 1.1                               | 1.02           | 4.4  |
| 3,4-Dimethylheptane (L) | 1.2                             | 1.02           | 0.5  | 1.2                               | 1.02           | 0.5  |
| 2,2,5-Trimethylhexane   | 1.3                             | 1.02           | 1.4  | 1.3                               | 1.02           | 1.4  |
| 2,3,4-Trimethylhexane   | 1.1                             | 1.02           | 1.7  | 1.1                               | 1.02           | 2.0  |

**Table S3: The optimized FWHMs, scaling factors, and corresponding SSRs for various olefin compounds.**

| Olefin                     | Length Form Oscillator Strength |                |      | Velocity Form Oscillator Strength |                |      |
|----------------------------|---------------------------------|----------------|------|-----------------------------------|----------------|------|
|                            | FWHM                            | Scaling Factor | SSR  | FWHM                              | Scaling Factor | SSR  |
| 2-Methyl-1-butene          | 1.2                             | 1.01           | 13.8 | 1.2                               | 1.01           | 13.8 |
| 3-Methyl-1-butene          | 1.0                             | 1.02           | 27.1 | 1.0                               | 1.02           | 27.6 |
| 1-Butene                   | 1.0                             | 1.02           | 35.4 | 1.1                               | 1.02           | 36.6 |
| cis-2-Heptene              | 1.2                             | 1.02           | 18.3 | 1.2                               | 1.02           | 16.3 |
| cis-3-Heptene              | 1.1                             | 1.02           | 17.4 | 1.1                               | 1.02           | 16.0 |
| trans-2-Heptene            | 1.1                             | 1.02           | 9.0  | 1.1                               | 1.02           | 8.8  |
| trans-3-Heptene            | 0.9                             | 1.02           | 7.0  | 0.9                               | 1.02           | 6.1  |
| 1-Heptene                  | 1.1                             | 1.02           | 13.9 | 1.1                               | 1.02           | 13.3 |
| 1-Hexene                   | 1.2                             | 1.02           | 12.8 | 1.2                               | 1.02           | 12.7 |
| 4-Methyl-1-pentene         | 1.0                             | 1.02           | 11.0 | 1.0                               | 1.02           | 10.4 |
| 1-Pentene                  | 1.1                             | 1.01           | 18.6 | 1.2                               | 1.01           | 18.8 |
| 2-Methyl-2-pentene         | 1.1                             | 1.02           | 10.0 | 1.2                               | 1.02           | 10.6 |
| cis-2-Pentene              | 1.0                             | 1.00           | 23.6 | 1.0                               | 1.00           | 21.8 |
| trans-2-Pentene            | 1.0                             | 1.02           | 8.0  | 1.0                               | 1.02           | 8.8  |
| 2-Methyl-1-pentene         | 1.2                             | 1.01           | 9.4  | 1.2                               | 1.01           | 9.4  |
| 3,3-Dimethyl-1-pentene     | 0.9                             | 1.01           | 10.8 | 0.9                               | 1.01           | 11.1 |
| 3-Methyl-1-pentene         | 1.3                             | 1.01           | 24.2 | 1.4                               | 1.01           | 24.1 |
| cis-3,4-Dimethyl-2-pentene | 0.9                             | 1.02           | 16.5 | 0.9                               | 1.02           | 12.9 |
| cis-4,4-Dimethyl-2-pentene | 0.7                             | 0.98           | 41.2 | 0.7                               | 0.98           | 39.2 |
| trans-2-Butene             | 1.1                             | 1.02           | 16.2 | 1.1                               | 1.02           | 15.4 |
| 2-Methyl-2-butene          | 1.3                             | 1.02           | 17.1 | 1.3                               | 1.02           | 16.4 |
| 3,3-Dimethyl-1-butene      | 1.5                             | 1.02           | 38.1 | 1.5                               | 1.02           | 38.4 |
| cis-2-Butene               | 1.1                             | 1.02           | 21.5 | 1.1                               | 1.02           | 20.6 |
| cis-4-Methyl-2-pentene     | 0.7                             | 0.99           | 32.2 | 0.7                               | 0.99           | 27.6 |
| trans-4-Methyl-2-pentene   | 0.9                             | 0.98           | 37.5 | 0.9                               | 0.98           | 32.6 |
| cis-3-Hexene               | 1.1                             | 1.00           | 19.4 | 1.1                               | 1.00           | 18.8 |
| cis-2-Hexene               | 1.1                             | 1.01           | 18.1 | 1.1                               | 1.01           | 15.4 |
| trans-2-Hexene             | 1.0                             | 1.02           | 8.0  | 1.0                               | 1.02           | 7.8  |
| cis-3-Methyl-3-hexene      | 0.8                             | 1.00           | 7.6  | 0.9                               | 1.00           | 7.0  |
| trans-3-Hexene             | 1.1                             | 0.98           | 8.1  | 1.1                               | 0.98           | 8.8  |
| 3-Methyl-1-hexene          | 1.4                             | 1.02           | 16.8 | 1.4                               | 1.02           | 16.2 |
| Ethylene                   | 0.9                             | 1.02           | 69.8 | 0.5                               | 1.02           | 65.1 |
| Propene                    | 1.3                             | 1.02           | 52.5 | 1.0                               | 1.01           | 51.7 |
| Isobutylene                | 1.5                             | 1.02           | 52.7 | 1.5                               | 1.02           | 52.1 |
| 1-Nonene                   | 1.1                             | 1.02           | 11.3 | 1.1                               | 1.02           | 10.7 |
| cis-2-Nonene               | 1.2                             | 1.02           | 30.8 | 1.2                               | 1.02           | 28.0 |
| cis-3-Nonene               | 1.0                             | 1.02           | 16.7 | 1.1                               | 1.02           | 15.3 |
| trans-2-Nonene             | 1.0                             | 1.02           | 14.5 | 1.0                               | 1.02           | 13.8 |
| trans-3-Nonene             | 0.9                             | 1.02           | 11.6 | 0.9                               | 1.02           | 10.6 |
| 1-Decene                   | 1.1                             | 1.02           | 11.3 | 1.1                               | 1.02           | 10.8 |
| 1-Octene                   | 1.1                             | 1.02           | 12.1 | 1.1                               | 1.02           | 11.5 |
| cis-2-Octene               | 1.1                             | 1.02           | 32.8 | 1.1                               | 1.02           | 29.1 |
| trans-2-Octene             | 1.0                             | 1.02           | 15.2 | 1.0                               | 1.02           | 14.1 |
| 1-Dodecene                 | 1.2                             | 1.02           | 9.7  | 1.2                               | 1.02           | 9.2  |
| 1-Tetradecene              | 1.2                             | 1.02           | 10.8 | 1.2                               | 1.02           | 10.5 |
| 1-Tridecene                | 1.2                             | 1.02           | 10.0 | 1.2                               | 1.02           | 9.6  |
| 1-Undecene                 | 1.1                             | 1.02           | 8.5  | 1.2                               | 1.02           | 8.0  |
| 2,3-Dimethyl-1-butene      | 0.7                             | 0.99           | 27.7 | 0.7                               | 0.99           | 24.5 |

**Table S4: The optimized FWHMs, scaling factors, and corresponding SSRs for various naphthene compounds.**

| Naphthene                       | Length Form Oscillator Strength |                |      | Velocity Form Oscillator Strength |                |      |
|---------------------------------|---------------------------------|----------------|------|-----------------------------------|----------------|------|
|                                 | FWHM                            | Scaling Factor | SSR  | FWHM                              | Scaling Factor | SSR  |
| 1,1-Dimethylcyclopentane        | 1.3                             | 1.01           | 1.5  | 1.4                               | 1.02           | 1.2  |
| 1-Ethyl-1-methylcyclopentane    | 1.0                             | 1.02           | 1.9  | 1.0                               | 1.02           | 2.5  |
| ccc-1,2,3-Trimethylcyclopentane | 1.3                             | 1.02           | 1.5  | 1.2                               | 1.02           | 1.8  |
| cis-1,3-Dimethylcyclopentane    | 1.3                             | 1.02           | 7.7  | 1.4                               | 1.02           | 9.3  |
| ctc-1,2,3-Trimethylcyclopentane | 1.4                             | 1.02           | 8.1  | 1.4                               | 1.02           | 8.4  |
| ctc-1,2,4-Trimethylcyclopentane | 1.3                             | 1.02           | 12.7 | 1.3                               | 1.02           | 13.6 |
| ctt-1,2,4-Trimethylcyclopentane | 1.7                             | 1.02           | 5.4  | 1.7                               | 1.02           | 5.4  |
| Cyclopentane                    | 1.5                             | 1.01           | 1.2  | 1.6                               | 1.02           | 1.3  |
| Ethylcyclopentane               | 1.5                             | 1.01           | 1.5  | 1.5                               | 1.01           | 1.5  |
| Isopropylcyclopentane           | 1.0                             | 1.02           | 13.6 | 1.3                               | 1.02           | 15.8 |
| Methylcyclopentane              | 1.2                             | 1.02           | 1.2  | 1.1                               | 1.02           | 2.0  |
| n-Propylcyclopentane            | 1.0                             | 1.01           | 2.9  | 1.1                               | 1.02           | 3.4  |
| trans-1,2-Dimethylcyclopentane  | 1.4                             | 1.02           | 1.1  | 1.4                               | 1.02           | 1.6  |
| trans-1,3-Dimethylcyclopentane  | 1.4                             | 1.02           | 12.1 | 1.5                               | 1.02           | 14.9 |
| cis-1,2-Dimethylcyclopentane    | 1.0                             | 1.00           | 0.3  | 1.0                               | 1.01           | 0.2  |
| Methylcyclohexane               | 1.3                             | 1.02           | 2.5  | 1.4                               | 1.02           | 2.7  |
| cis-1,2-Dimethylcyclohexane     | 1.2                             | 1.02           | 1.9  | 1.2                               | 1.02           | 2.0  |
| Cyclohexane                     | 1.9                             | 1.02           | 5.8  | 1.9                               | 1.02           | 6.2  |
| trans-1,2-Dimethylcyclohexane   | 1.0                             | 1.02           | 1.1  | 1.0                               | 1.02           | 1.1  |
| trans-1,4-Dimethylcyclohexane   | 1.2                             | 1.02           | 2.5  | 1.2                               | 1.02           | 2.5  |
| 1,1-Dimethylcyclohexane         | 1.0                             | 1.02           | 3.1  | 1.0                               | 1.02           | 3.1  |
| cis-1,4-Dimethylcyclohexane     | 1.3                             | 1.02           | 1.8  | 1.2                               | 1.02           | 1.8  |
| Cyclopropane                    | 1.2                             | 1.02           | 2.9  | 1.2                               | 1.02           | 2.9  |
| ctc-1,2,3-Trimethylcyclohexane  | 1.0                             | 1.02           | 1.7  | 1.0                               | 1.02           | 1.8  |
| ccc-1,3,5-Trimethylcyclohexane  | 1.3                             | 1.02           | 17.7 | 1.2                               | 1.02           | 18.0 |
| 1,1,2-Trimethylcyclohexane      | 1.2                             | 1.02           | 1.3  | 1.2                               | 1.02           | 1.2  |
| 1,1,4-Trimethylcyclohexane      | 1.2                             | 1.02           | 2.8  | 1.2                               | 1.02           | 2.7  |
| ctc-1,2,4-Trimethylcyclohexane  | 1.3                             | 1.02           | 0.8  | 1.3                               | 1.02           | 0.7  |
| ctt-1,2,4-Trimethylcyclohexane  | 1.1                             | 1.02           | 0.7  | 1.1                               | 1.02           | 0.8  |
| Isobutylcyclohexane             | 1.4                             | 1.02           | 3.4  | 1.4                               | 1.02           | 3.4  |
| Isobutylcyclopentane            | 1.3                             | 1.02           | 0.4  | 1.2                               | 1.02           | 0.4  |
| Isopropylcyclohexane            | 1.9                             | 1.02           | 1.9  | 1.9                               | 1.02           | 1.8  |
| n-Butylcyclopentane             | 1.0                             | 1.02           | 0.5  | 1.0                               | 1.02           | 0.8  |
| t-1-Methyl-2-propylcyclohexane  | 1.0                             | 1.02           | 1.0  | 1.0                               | 1.02           | 1.1  |
| t-1-Methyl-2-(4MP)cyclopentane  | 1.0                             | 1.02           | 3.6  | 1.0                               | 1.02           | 4.5  |

**Table S5: The optimized FWHMs, scaling factors, and corresponding SSRs for various aromatic compounds.**

| Aromatic                            | Length Form Oscillator Strength |                |      | Velocity Form Oscillator Strength |                |      |
|-------------------------------------|---------------------------------|----------------|------|-----------------------------------|----------------|------|
|                                     | FWHM                            | Scaling Factor | SSR  | FWHM                              | Scaling Factor | SSR  |
| Benzene                             | 0.4                             | 1.00           | 12.4 | 0.4                               | 1.00           | 12.1 |
| Toluene                             | 0.5                             | 1.01           | 12.7 | 0.5                               | 1.01           | 12.3 |
| Ethylbenzene                        | 0.4                             | 1.00           | 10.0 | 0.4                               | 1.00           | 9.8  |
| n-Propylbenzene                     | 0.4                             | 1.00           | 9.4  | 0.4                               | 1.00           | 9.1  |
| Isopropylbenzene                    | 0.5                             | 1.00           | 11.9 | 0.5                               | 1.00           | 11.6 |
| m-Xylene                            | 0.5                             | 1.01           | 12.1 | 0.5                               | 1.01           | 11.8 |
| p-Xylene                            | 0.5                             | 1.01           | 11.0 | 0.5                               | 1.01           | 10.8 |
| o-Xylene                            | 0.5                             | 1.00           | 11.5 | 0.5                               | 1.00           | 11.7 |
| 1-Methyl-2-ethylbenzene             | 0.5                             | 1.00           | 14.7 | 0.5                               | 1.00           | 14.5 |
| 1-Methyl-3-ethylbenzene             | 0.4                             | 1.01           | 10.2 | 0.4                               | 1.01           | 10.2 |
| 1-Methyl-4-ethylbenzene             | 0.5                             | 1.01           | 8.4  | 0.5                               | 1.01           | 8.5  |
| 1,2,4-Triethylbenzene               | 0.5                             | 0.99           | 13.5 | 0.5                               | 0.99           | 13.9 |
| 1,3,5-Triethylbenzene               | 0.3                             | 0.98           | 89.4 | 0.3                               | 0.98           | 85.3 |
| 1,2,4-Trimethylbenzene              | 0.5                             | 1.01           | 10.8 | 0.5                               | 1.01           | 10.7 |
| 1,3,5-Trimethylbenzene              | 0.4                             | 1.01           | 19.4 | 0.4                               | 1.01           | 19.3 |
| 1-Methyl-2-isopropylbenzene         | 0.5                             | 1.01           | 11.8 | 0.5                               | 1.01           | 11.7 |
| 1-Methyl-3-isopropylbenzene         | 0.5                             | 1.01           | 15.0 | 0.5                               | 1.01           | 15.2 |
| 1-Methyl-4-isopropylbenzene         | 0.5                             | 1.01           | 7.5  | 0.5                               | 1.01           | 7.2  |
| 1-Methyl-2-n-propylbenzene          | 0.5                             | 1.00           | 11.1 | 0.5                               | 1.00           | 11.3 |
| 1-Methyl-3-n-propylbenzene          | 0.5                             | 1.01           | 13.5 | 0.5                               | 1.01           | 13.8 |
| 1-Methyl-4-n-propylbenzene          | 0.5                             | 1.01           | 7.8  | 0.5                               | 1.01           | 8.2  |
| tert-1-Butyl-2-methylbenzene        | 0.5                             | 1.01           | 11.2 | 0.5                               | 1.01           | 11.0 |
| 1,2-Dimethyl-3-ethylbenzene         | 0.5                             | 1.00           | 9.0  | 0.5                               | 1.00           | 9.3  |
| 1,2-Dimethyl-4-ethylbenzene         | 0.5                             | 1.00           | 12.3 | 0.5                               | 1.00           | 13.2 |
| 1,3-Dimethyl-2-ethylbenzene         | 0.4                             | 1.00           | 12.4 | 0.4                               | 1.00           | 12.4 |
| 1,3-Dimethyl-5-ethylbenzene         | 0.4                             | 1.01           | 17.6 | 0.4                               | 1.01           | 17.3 |
| 1,4-Dimethyl-2-ethylbenzene         | 0.6                             | 1.00           | 11.3 | 0.5                               | 1.00           | 11.5 |
| 1,3-Dimethyl-4-ethylbenzene         | 0.5                             | 1.01           | 5.2  | 0.5                               | 1.01           | 5.2  |
| n-Butylbenzene                      | 0.5                             | 1.00           | 15.9 | 0.5                               | 1.00           | 16.0 |
| n-Hexylbenzene                      | 0.5                             | 1.00           | 16.8 | 0.5                               | 1.00           | 16.8 |
| n-Pentylbenzene                     | 0.4                             | 1.00           | 15.1 | 0.4                               | 1.00           | 15.2 |
| Isobutylbenzene                     | 0.4                             | 1.00           | 12.8 | 0.4                               | 1.00           | 12.3 |
| sec-Butylbenzene                    | 0.4                             | 1.00           | 11.4 | 0.4                               | 1.00           | 10.9 |
| tert-Butylbenzene                   | 0.5                             | 1.00           | 13.9 | 0.4                               | 1.00           | 13.5 |
| 1,2,3,5-Tetramethylbenzene          | 0.6                             | 1.02           | 15.2 | 0.6                               | 1.02           | 15.1 |
| 1,2,4,5-Tetramethylbenzene          | 0.6                             | 1.02           | 11.5 | 0.6                               | 1.02           | 11.9 |
| 1,2-Diethylbenzene                  | 0.4                             | 1.00           | 12.7 | 0.4                               | 1.00           | 12.7 |
| tert-1-Butyl-3,4,5-trimethylbenzene | 0.5                             | 1.00           | 15.0 | 0.5                               | 1.01           | 15.5 |
| Pentamethylbenzene                  | 0.6                             | 1.01           | 12.8 | 0.6                               | 1.02           | 12.8 |
| 2-Methylbutylbenzene                | 0.4                             | 1.00           | 10.0 | 0.4                               | 1.00           | 9.7  |
| t-1-Butyl-3,5-dimethylbenzene       | 0.5                             | 1.01           | 16.5 | 0.5                               | 1.01           | 16.8 |
| t-1-Butyl-4-ethylbenzene            | 0.5                             | 1.00           | 7.0  | 0.5                               | 1.00           | 7.1  |
